# Supplementary material for: Metal-directed self-assembly of bimetallic dithiocarbamate transition metal cryptands and their binding capabilitiesElectronic supplementary information (ESI) available: selected experimental procedures. See http://www.rsc.org/suppdata/cc/b3/b308629a/
Source: Royal Society of Chemistry journal article supplement (doi:10.1039/b308629a), 2003-01-01
Supplement: b308629a.pdf [file b308629a.pdf]

## Electronic Supplementary Information (ESI)

### Cryptand 2a

#### Step 1

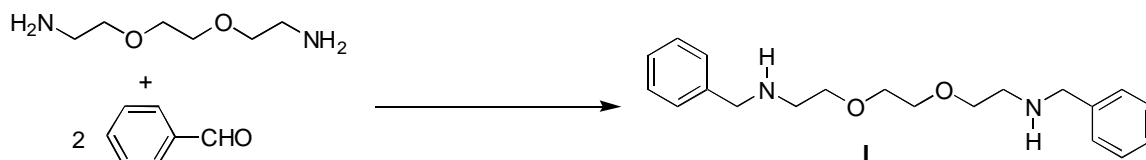

#### Method 1: Melt

Benzaldehyde (3g, 28mmol) was heated in an oil bath with stirring. 2,2'-(ethylenedioxy)bis(ethylamine) (2.1g, 14.2mmol) was added drop-wise, and the mixture cooled to room temperature after emission of H<sub>2</sub>O vapour had ceased. The resulting imine was suspended in 30mL of MeOH, and NaBH<sub>4</sub> (6.48g, 0.171 mol) was added portion-wise under N<sub>2(g)</sub>, before stirring for two and a half hours. The mixture was evaporated to dryness, and dissolved in H<sub>2</sub>O. The product was extracted into CHCl<sub>3</sub>, and dried over MgSO<sub>4</sub>. Filtration followed by solvent removal and drying *in vacuo* yielded a brown oil (3.72g, 80% yield).

#### Method 2: Dean-Stark

The benzaldehyde and 2,2'-(ethylenedioxy)bis(ethylamine) were dissolved in 120mL toluene and refluxed for 4 hours using Dean-Stark apparatus to remove H<sub>2</sub>O, encouraging imine formation. The mixture was cooled and the toluene removed under vacuum. The resulting imine was then suspended in 30mL MeOH, and reduced to the amine (3.72g, 80% yield), as above.

$d^1\text{H NMR}$  ( $\text{CDCl}_3$ , 300 MHz, 288K): 1.90 (2H, s,  $\text{ArCH}_2\text{NH}$ , exchange broadened), 2.78 (4H, t,  $^3J=5.3\text{Hz}$ ,  $\text{ArCH}_2\text{NHCH}_2$ ), 3.57 (8H, m [two indistinguishable triplets of similar chemical shift],  $\text{ArCH}_2\text{NHCH}_2\text{CH}_2\text{OCH}_2$ -), 3.77 (4H, s,  $\text{ArCH}_2$ ), 7.30 (10H, m, **ArH**)

**ESMS**  $m/z$ : 329.2 [ $\text{M}+\text{H}^+$ ]<sup>+</sup>

## Step 2

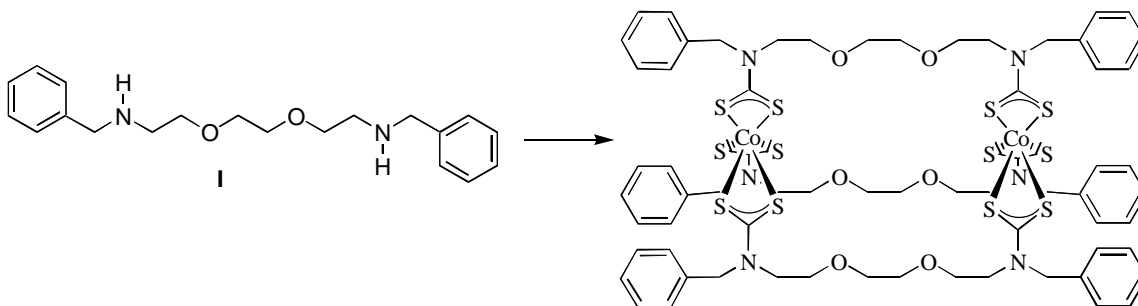

0.5g (1.5mmol) of **I** was dissolved in 30mL of acetonitrile or THF.  $\text{Et}_3\text{N}$  (0.31g, 3.1mmol) and  $\text{CS}_2$  (0.23g, 3.1mmol) were added and stirred for 2 hours before increasing the solvent volume to 500mL.  $\text{CoCl}_2 \cdot 6\text{H}_2\text{O}$  (0.24g, 1.02mmol) was added and the mixture stirred for 15 hours under  $\text{N}_{2(g)}$ . The solution was then evaporated to dryness, before being redissolved in  $\text{CH}_2\text{Cl}_2$ . It was washed four times with water, and then dried over  $\text{MgSO}_4$ . The  $\text{CH}_2\text{Cl}_2$  was removed under reduced pressure. The resulting green powder was dried overnight *in vacuo*, before being recrystallized from  $\text{CH}_2\text{Cl}_2$  and  $\text{Et}_2\text{O}$  (0.1g, 13% yield).

$d^1\text{H NMR}$  ( $\text{CDCl}_3$ , 300 MHz, 288K): broad signals. 3.29 (12H, one broad signal rather than the expected triplet,  $-\text{NHCH}_2\text{CH}_2$ ), 3.58 (24H, m [two indistinguishable triplets of similar chemical shift],  $-\text{CH}_2\text{OCH}_2-$ ), 4.13 (12H, s,  $\text{ArCH}_2$ ), 7.30 (30H, m, **ArH**)  $d^{13}\text{C NMR}$  ( $\text{CDCl}_3$ , 75.5 MHz, 288K): 47.0 ( $\text{CH}_2$ ), 52.6 ( $\text{CH}_2$ ), 68.6 ( $\text{CH}_2$ ), 70.4 ( $\text{CH}_2$ ),

128.9 ( $A_{\rho}C^{2/3/4}$ ), 135.3 ( $ArC^1$ ), 208.6 ( $CS_2$ )

ESMS m/z: 1552.1  $[M]^+$ , 1575.1  $[M+Na]^+$ , 1591.2  $[M+K]^+$

|                       |              |   |      |   |     |   |     |
|-----------------------|--------------|---|------|---|-----|---|-----|
| Elemental analysis %: | Calculated   | C | 51.0 | H | 5.1 | N | 5.4 |
|                       | Experimental | C | 50.8 | H | 5.3 | N | 5.9 |

## Cryptand 5b

### Step 1 - 2-Chloro-N-[2-(2-chloro-acetylamino)-phenyl]-acetamide

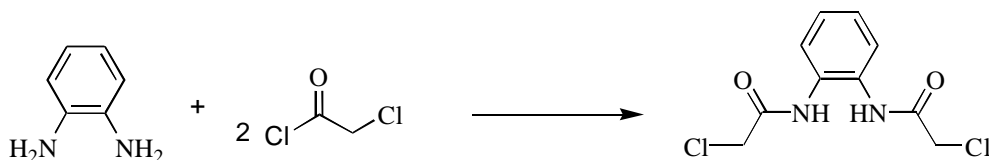

1,2-phenyldiamine (2.16g, 20.0mmol) was dissolved in  $CHCl_3$  (50mL) and to this was added KOH (2.36g, 40.0mmol) in  $H_2O$  (20mL). Chloroacetyl chloride (4.52g, 40.0mmol) was dissolved in  $CHCl_3$  (50mL) and added drop wise to the mixture with stirring. After 15 minutes the solid was filtered off and washed with  $Et_2O$  (20mL). Drying in *vacuo* yielded a pink solid.

**Yield** = 5.12g (98.1%)

$^1H$  NMR (300MHz,  $DMSO-d_6$ ) •: 8.67 (br, 2H, NH), 7.52 (d of d,  $^3J = 6Hz$ ,  $^4J = 3Hz$ , 2H, ArH), 7.32 (d of d,  $^3J = 6Hz$ ,  $^4J = 3Hz$ , 2H, ArH), 4.24 (s, 4H,  $CH_2Cl$ )

ESMS m/z: 283.1  $[M + Na]^+$

### Step 2 - 2-Hexylamino-N-[2-(2-chloro-acetylamino)-phenyl]-acetamide

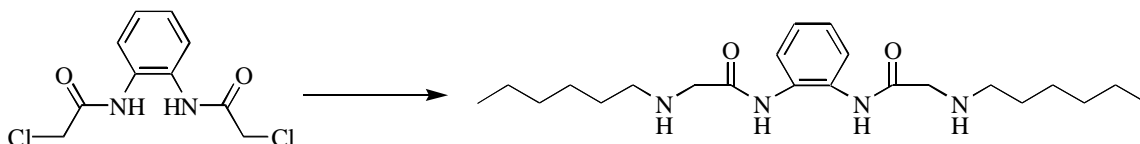

Hexylamine (20mL, excess) was heated to 40°C and 2-chloro-*N*-[2-(2-chloro-acetylamino)-phenyl]-acetamide (4.24g, 16.6mmol) was added portion wise with stirring. The mixture was stirred for 12 hours. H<sub>2</sub>O (200mL) was added and the product extracted into CH<sub>2</sub>Cl<sub>2</sub> (4x50mL) and then washed again with H<sub>2</sub>O (200mL) and dried over K<sub>2</sub>CO<sub>3</sub>. Filtration followed by solvent removal and heating at 40°C in *vacuo* yielded a yellow oil.

**Yield** = 2.83g (63.0%)

**<sup>1</sup>H NMR** (300MHz, CDCl<sub>3</sub>) •: 9.42 (t, <sup>3</sup>J = 7Hz, 2H, CONH), 7.60 (d of d, <sup>3</sup>J = 6Hz, <sup>4</sup>J = 4Hz, 2H, ArH), 7.17 (d of d, <sup>3</sup>J = 6Hz, <sup>4</sup>J = 4Hz, 2H, ArH), 3.39 (s, 4H, COCH<sub>2</sub>), 2.64 (t, <sup>3</sup>J = 8Hz, NHCH<sub>2</sub>CH<sub>2</sub>), 1.49 (m, 4H, NHCH<sub>2</sub>CH<sub>2</sub>), 1.29 (m, 12H, CH<sub>2</sub>CH<sub>2</sub>CH<sub>2</sub>CH<sub>3</sub>), 0.87 (t, <sup>3</sup>J = 7Hz, 12H, CH<sub>3</sub>)

**ESMS** m/z: 391.4 [M + H]<sup>+</sup>

### Step 3 - Cryptand 5b

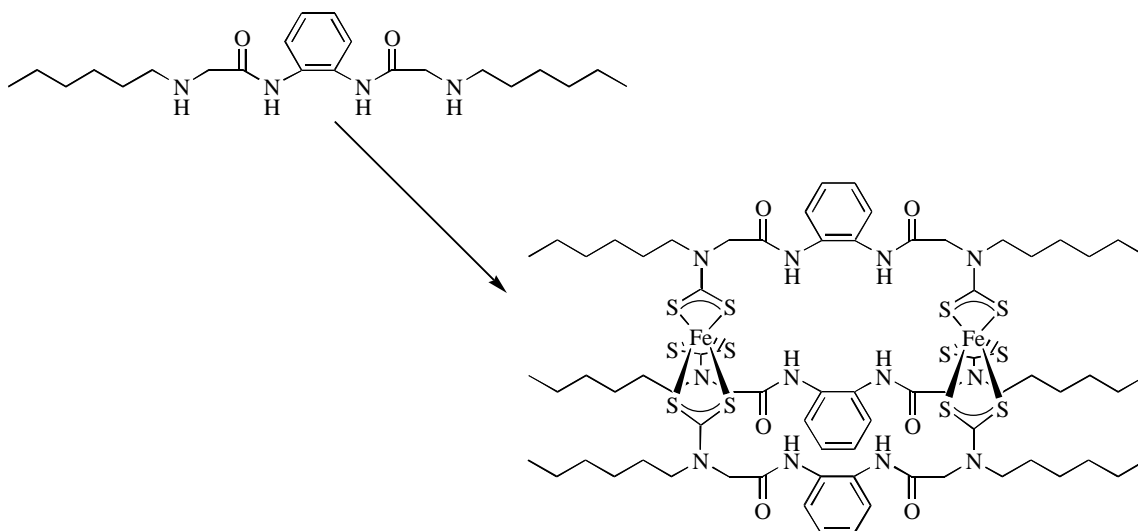

2-hexylamino-*N*-[2-(2-chloro-acetylamino)-phenyl]-acetamide (0.94g, 2.4mmol) was dissolved in THF:H<sub>2</sub>O (2:1 v/v, 30mL) and KOH (0.27g, 4.8mmol) was added and stirred under N<sub>2(g)</sub> until dissolved. CS<sub>2</sub> (0.37g, 4.8mmol) was then added and the solution stirred for 30 minutes. FeCl<sub>3</sub> (0.29g, 1.6mmol) was added to the yellow solution and the mixture stirred for 15 hours. H<sub>2</sub>O (100mL) was added with stirring, filtration followed by recrystallisation from DMSO/Et<sub>2</sub>O followed by filtering and washing with EtOH (20mL) and Et<sub>2</sub>O (20mL) yielded a black powder which was dried in *vacuo*.

**Yield** = 0.91g (65.6%)

**UV/visible** (DMSO)  $\epsilon$ /nm ( $\epsilon/10^3 \text{ M}^{-1}\text{cm}^{-1}$ ): 354 sh (10.4), 389 sh (15.0), 503 sh (4.3), 602 sh (2.3)

**IR** (Nujol<sup>®</sup>)  $\epsilon$ /cm<sup>-1</sup>: 3214 (NH), 1676 (Amide I), 1518 (Amide II), 1482 (CN), 960 (CS<sub>as</sub>), 644 (CS<sub>s</sub>)

**ESMS** m/z: 1733.7 [M + H]<sup>+</sup>, 866.7 [M]<sup>2+</sup>

|                              |           |      |      |     |     |     |     |
|------------------------------|-----------|------|------|-----|-----|-----|-----|
| <b>Elemental Analysis</b> %: | Calculate | C    | 49.9 | H   | 6.3 | N   | 9.7 |
| Experimental                 | C         | 49.9 | H    | 6.0 | N   | 9.8 |     |
